# Supplementary figures and images for: Proteomic Characterization of Urinary Extracellular Vesicles from Kidney-Transplanted Patients Treated with Calcineurin Inhibitors
Source: MDPI journal article supplement (doi:10.3390/ijms21207569), 2020-10-14

Fig S1

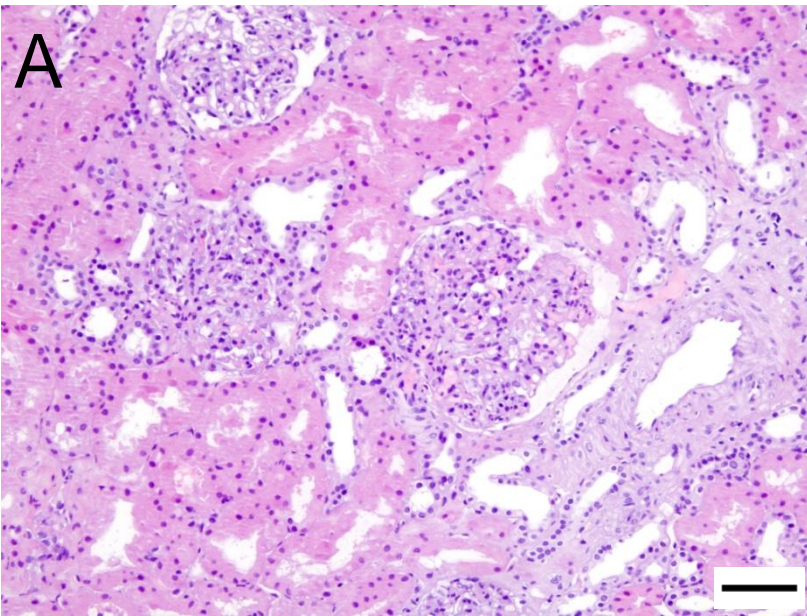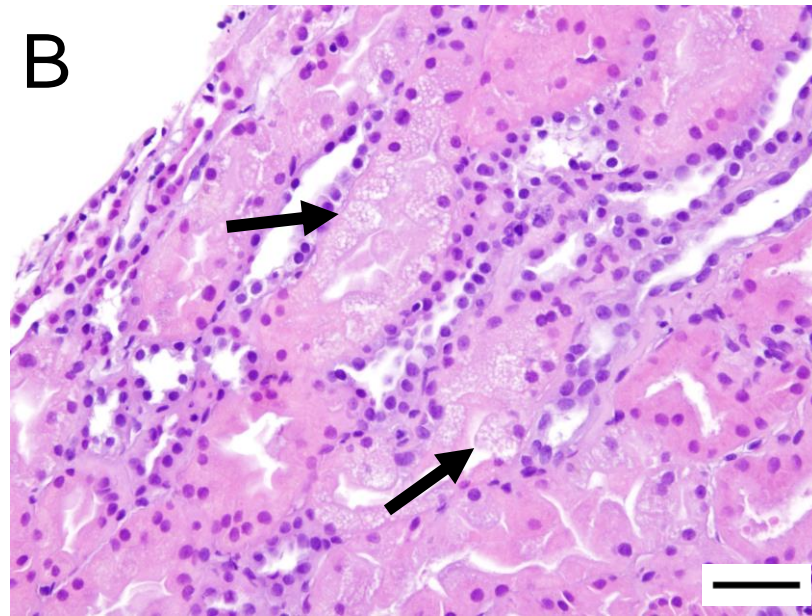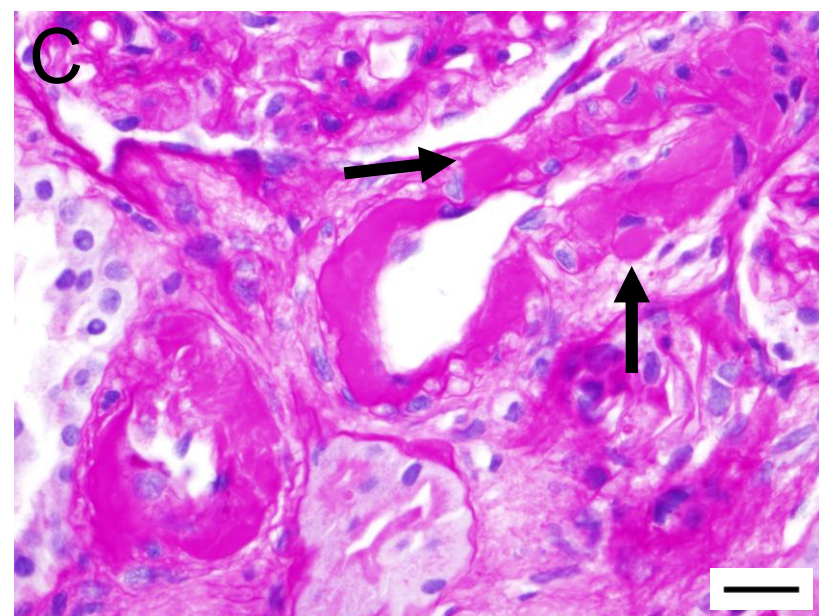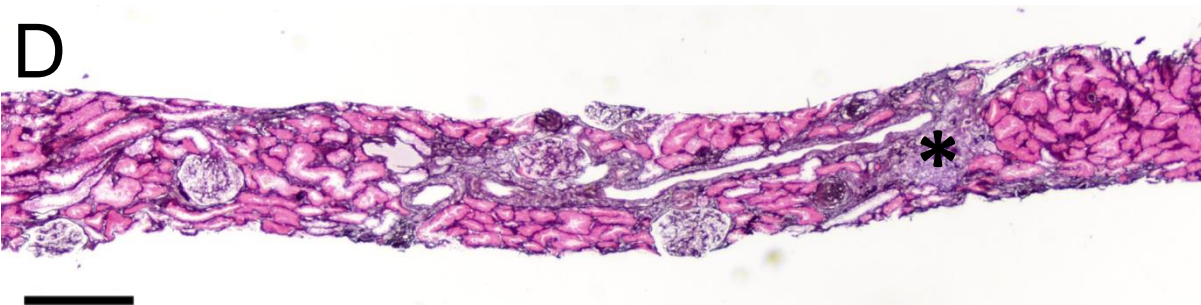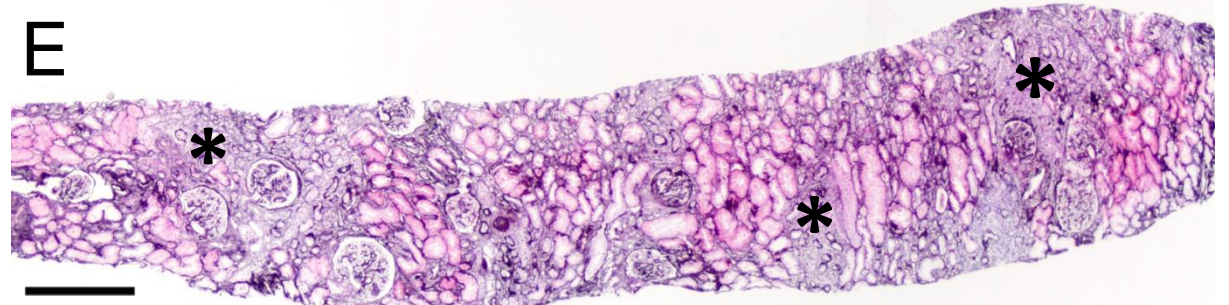

Supplement: s1 [file s1]
